# Supplementary material for: The Effect of the Addition of Copper Particles in High-Density Recycled Polyethylene Matrices by Extrusion
Source: MDPI journal article supplement (doi:10.3390/polym14235220), 2022-11-30
Supplement: s1 [file s1]

# The Effect of the Addition of Copper Particles in High-Density Recycled Polyethylene Matrices by Extrusion

Camila Arcos <sup>1,\*</sup>, Lisa Muñoz <sup>2</sup>, Deborah Cordova <sup>3</sup>, Hugo Muñoz <sup>1</sup>, Mariana Walter <sup>3</sup>, Manuel I. Azócar <sup>3</sup>, Ángel Leiva <sup>4</sup>, Mamié Sancy <sup>5,6</sup> and Gonzalo Rodríguez-Grau <sup>5,\*</sup>

<sup>1</sup> Departamento de Ingeniería Mecánica y Metalúrgica, Facultad de Ingeniería, Pontificia Universidad Católica de Chile, Santiago 7820436, Chile

<sup>2</sup> Instituto de Química, Facultad de Ciencias, Pontificia Universidad Católica de Valparaíso, Valparaíso 2373223, Chile

<sup>3</sup> Departamento de Química de los Materiales, Facultad de Química y Biología, Universidad de Santiago de Chile, Santiago 7820436, Chile

<sup>4</sup> Facultad de Química y Farmacia, Pontificia Universidad Católica de Chile, Santiago 7820436, Chile

<sup>5</sup> Escuela de Construcción Civil, Facultad de Ingeniería, Pontificia Universidad Católica de Chile, Santiago 7820436, Chile

<sup>6</sup> CIEN UC, Pontificia Universidad Católica de Chile, Santiago 7820436, Chile

\* Correspondence: cearcos@uc.cl (C.A.); grodriguezg@uc.cl (G.R.-G.)

**Table S1.** Variation of colonies number and fraction, and viability of *E. coli*.

| Sample       | Colonies Number | Colonies Fraction | Viability (%) |
|--------------|-----------------|-------------------|---------------|
| HDPE         | 118             | 112               | 100           |
|              | 106             |                   |               |
| rHDPE        | 42              | 41.5              | 100           |
|              | 41              |                   |               |
| HDPE Cu-NPs  | 6               | 9                 | 8.03          |
|              | 12              |                   |               |
| rHDPE Cu-NPs | 50              | 40                | 96.3          |
|              | 30              |                   |               |
| HDPE Cu-NCs  | 1               | 1.5               | 1.3           |
|              | 2               |                   |               |
| rHDPE Cu-NCs | 17              | 21                | 50.6          |
|              | 25              |                   |               |

**Table S2.** Variation of colonies number and fraction, and viability of *S. aureus*.

| Sample       | Colonies Number | Colonies Fraction | Viability (%) |
|--------------|-----------------|-------------------|---------------|
| HDPE         | >400            | 400               | 100           |
|              | >400            |                   |               |
|              | 30              |                   |               |
| rHDPE        | 50              | 50                | 100           |
|              | 50              |                   |               |
| HDPE Cu-NPs  | 9               | 9                 | 2.25          |
|              | 9               |                   |               |
| rHDPE Cu-NPs | 49              | 40.5              | 81            |
|              | 32              |                   |               |
| HDPE Cu-NCs  | 2               | 3                 | 0.75          |
|              | 4               |                   |               |
| rHDPE Cu-NCs | 26              | 39                | 78            |
|              | 52              |                   |               |
